# Supplementary material for: Acute Stroke Care in Korea in 2013–2014: National Averages and Disparities
Source: PubMed Central journal article supplement — J Korean Med Sci. 2020 Apr 27;35(20):e167. doi: 10.3346/jkms.2020.35.e167 (PMC7246192; doi:10.3346/jkms.2020.35.e167), 2020-04-27
Supplement: jkms-35-e167-s011.pdf [file jkms-35-e167-s011.pdf]

## Supplementary References

1. The Joint Commission: Primary Stroke Centers.  
[https://www.jointcommission.org/certification/dsc\\_neuro2.aspx](https://www.jointcommission.org/certification/dsc_neuro2.aspx). Accessed January 23, 2020.
2. Fonarow GC, Reeves MJ, Smith EE, Saver JL, Zhao X, Olson DW, et al. Characteristics, performance measures, and in-hospital outcomes of the first one million stroke and transient ischemic attack admissions in get with the guidelines-stroke. *Circ Cardiovasc Qual Outcomes* 2010;3(3):291-302.
3. Hsieh FI, Lien LM, Chen ST, Bai CH, Sun MC, Tseng HP, et al. Get With the Guidelines-Stroke performance indicators: surveillance of stroke care in the Taiwan Stroke Registry: Get With the Guidelines-Stroke in Taiwan. *Circulation* 2010;122(11):1116-23.
4. Mikulik R, Caso V, Wahlgren N. Past and future of stroke care in Europe. *Oruen-CNS J* 2017;2:19-26.
5. Royal College of Physicians, Mind the Gap! The Third SSNAP Annual Report. Care received between April 2015 to March 2016. 2016,  
<https://www.strokeaudit.org/Documents/National/Clinical/AugNov2016/AugNov2016-PublicReport.aspx>. Accessed June 18, 2019.
6. Wiedmann S, Heuschmann PU, Hillmann S, Busse O, Wiethölter H, Walter GM, et al. The Quality of Acute Stroke Care—an Analysis of Evidence-Based Indicators in 260 000 Patients. *Deutsches Ärzteblatt International* 2014;111(45):759.
7. Group CW. Management of ischemic stroke in Central and Eastern Europe. *International Journal of Stroke* 2015;10(SA100):125-7.
8. Benjamin EJ, Blaha MJ, Chiuve SE, Cushman M, Das SR, Deo R, et al. Heart Disease and Stroke Statistics-2017 Update: A Report From the American Heart Association. *Circulation* 2017;135(10):e146-e603.
9. Titianova E, Velcheva I, Stamenov B. *Treatment of acute ischemic stroke with thrombolysis in bulgaria*; 2010, 9-14.
10. Stevens E, Emmett E, Wang Y, McKevitt C, Wolfe C. The burden of stroke in Europe. *report for*

*Stroke Alliance for Europe 2017.*

11. Willeit J, Geley T, Schoch J, Rinner H, Tur A, Kreuzer H, et al. Thrombolysis and clinical outcome in patients with stroke after implementation of the Tyrol Stroke Pathway: a retrospective observational study. *Lancet Neurol* 2015;14(1):48-56.
12. Foundation NS. National Stroke Audit - Acute Services Report 2015. *Melbourne, Australia.*
13. Smith EE, Saver JL, Cox M, Liang L, Matsouaka R, Xian Y, et al. Increase in Endovascular Therapy in Get With The Guidelines-Stroke After the Publication of Pivotal Trials. *Circulation* 2017;136(24):2303-10.
14. Weber R, Eyding J, Kitzrow M, Bartig D, Weimar C, Hacke W, et al. Distribution and evolution of acute interventional ischemic stroke treatment in Germany from 2010 to 2016. *Neurological Research and Practice* 2019;1(1):4.
15. Riksstroke Swedish Stroke Register. Brief Summary of Riksstroke Data for the Full Year 2017. <http://www.riksstroke.org/annual-reports-and-graphs>. Accessed January 23, 2020.
16. Witt AH, Johnsen SP, Jensen LP, Hansen AK, Hundborg HH, Andersen G. Reducing delay of carotid endarterectomy in acute ischemic stroke patients: a nationwide initiative. *Stroke* 2013;44(3):686-90.
17. Adeoye O, Hornung R, Khatri P, Ringer A, Kleindorfer D. The rate of hemicraniectomy for acute ischemic stroke is increasing in the United States. *J Stroke Cerebrovasc Dis* 2011;20(3):251-4.
18. Suyama K, Horie N, Hayashi K, Nagata I. Nationwide survey of decompressive hemicraniectomy for malignant middle cerebral artery infarction in Japan. *World Neurosurg* 2014;82(6):1158-63.
19. Wilkins E, Wilson L, Wickramasinghe K, Bhatnagar P, Leal J, Luengo-Fernandez R, et al. European cardiovascular disease statistics 2017. 2017.
20. Inagawa T, Shibukawa M, Inokuchi F, Tokuda Y, Okada Y, Okada K. Primary intracerebral and aneurysmal subarachnoid hemorrhage in Izumo City, Japan. Part II: management and surgical outcome. *J Neurosurg* 2000;93(6):967-75.
21. Qureshi AI, Suri MF, Nasar A, Kirmani JF, Ezzeddine MA, Divani AA, et al. Changes in cost and outcome among US patients with stroke hospitalized in 1990 to 1991 and those hospitalized in 2000

to 2001. *Stroke* 2007;38(7):2180-4.

22. Langham J, Reeves BC, Lindsay KW, van der Meulen JH, Kirkpatrick PJ, Gholkar AR, et al. Variation in outcome after subarachnoid hemorrhage: a study of neurosurgical units in UK and Ireland. *Stroke* 2009;40(1):111-8.
